# Supplementary material for: Specific interaction between the DSPHTELP peptide and various functional groups
Source: Royal Society of Chemistry journal article supplement (doi:10.1039/d4cp01739k), 2024-01-01
Supplement: d4cp01739k1.pdf [file d4cp01739k1.pdf]

## Supporting Information

Specific interaction between DSPHTELP peptide and various functional groups

Haeun Kwon<sup>1†</sup>, Seongeon Jin<sup>2†</sup>, Jina Ko<sup>1</sup>, Jungki Ryu<sup>1,3,4,5</sup>, Ja-Hyoung Ryu<sup>2\*</sup>, Dong Woog Lee<sup>1\*</sup>

<sup>1</sup> School of Energy and Chemical Engineering, Ulsan National Institute of Science and Technology (UNIST), 50 UNIST-gil, Ulsan, 44919, Republic of Korea

<sup>2</sup> Department of Chemistry, School of Natural Sciences, Ulsan National Institute of Science and Technology (UNIST), 50 UNIST-gil, Ulsan, 44919, Republic of Korea

<sup>3</sup> Emergent Hydrogen Technology R&D center, Ulsan National Institute of Science and Technology (UNIST), Ulsan 44919, Republic of Korea

<sup>4</sup> Graduate School of Carbon Neutrality, Ulsan National Institute of Science and Technology (UNIST), Ulsan 44919, Republic of Korea.

<sup>5</sup> Center for Renewable Carbon, Ulsan National Institute of Science and Technology (UNIST), Ulsan 44919, Republic of Korea.

† These authors contributed equally to this work

\* Corresponding authors: [jhryu@unist.ac.kr](mailto:jhryu@unist.ac.kr) (J-H Ryu), [dongwoog.lee@unist.ac.kr](mailto:dongwoog.lee@unist.ac.kr) (DW Lee)

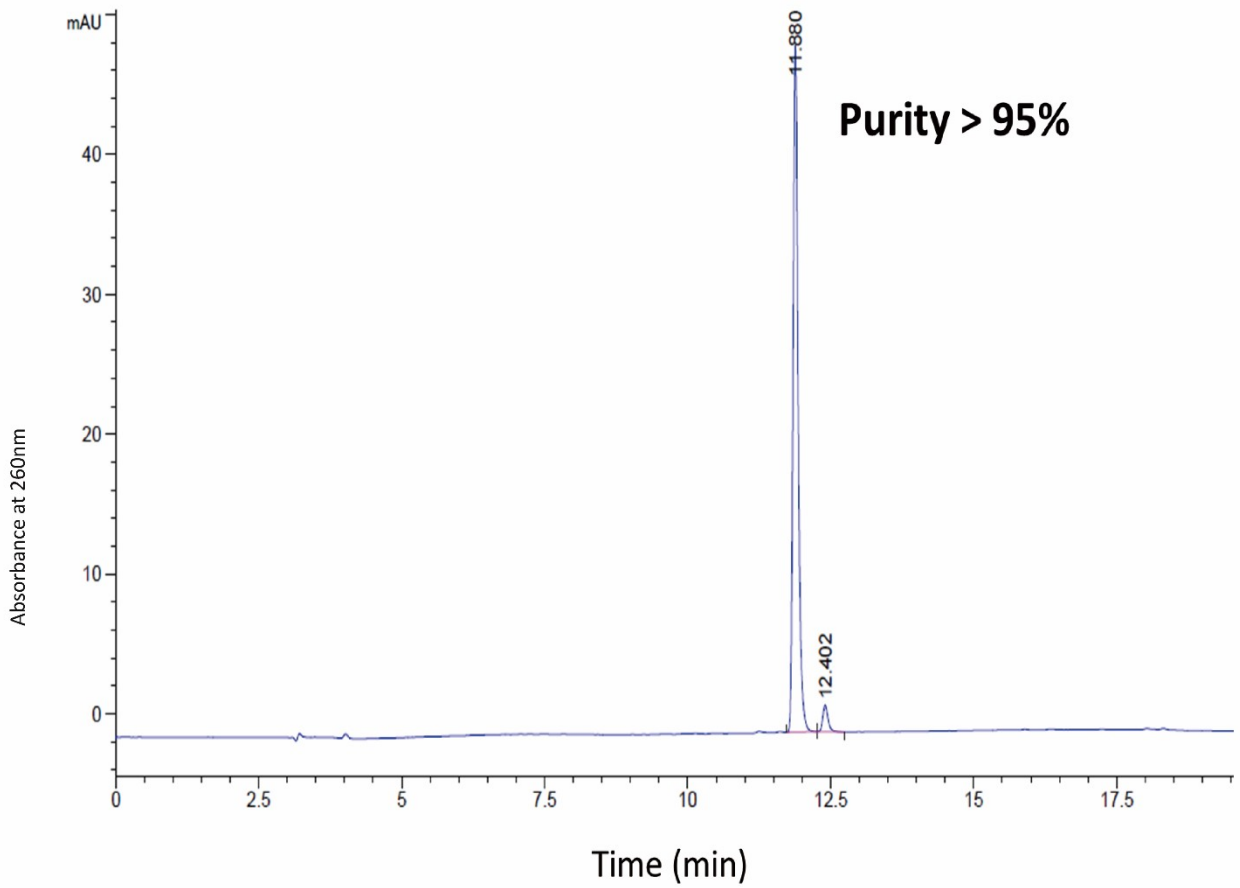

**Fig. S1.** HPLC chromatogram of synthesized and purified 8-mer peptide. The x-axis is time (min), and the y-axis is the absorbance at 260nm (mAU).

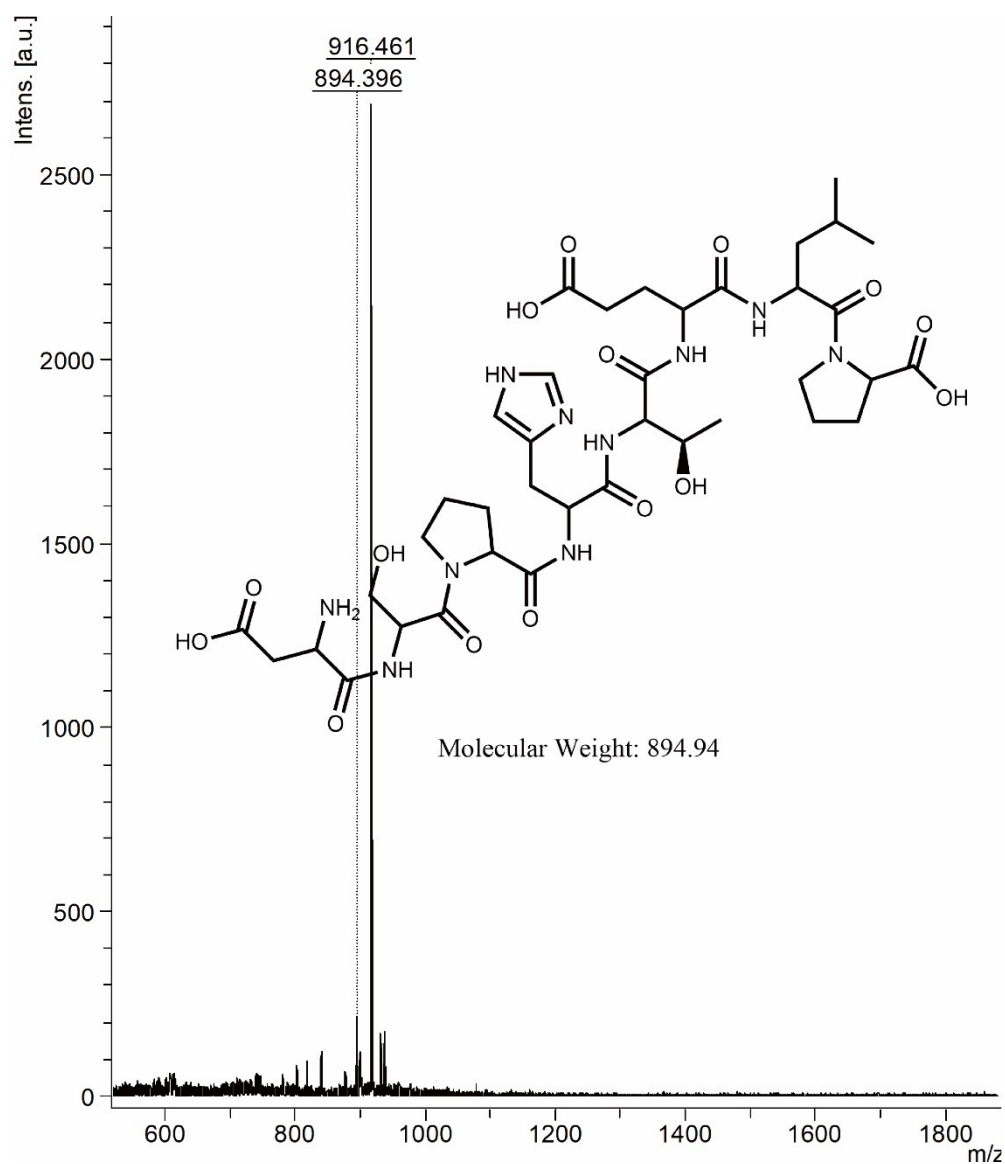

**Fig. S2.** Matrix-Assisted Laser Desorption/Ionization time-of-flight (MALDI-TOF/TOF) mass spectra of synthesized 8-mer peptide. The x-axis is the  $m/z$ (mass-to-charge) ratio, and y-axis is the intensities of the detected compounds.

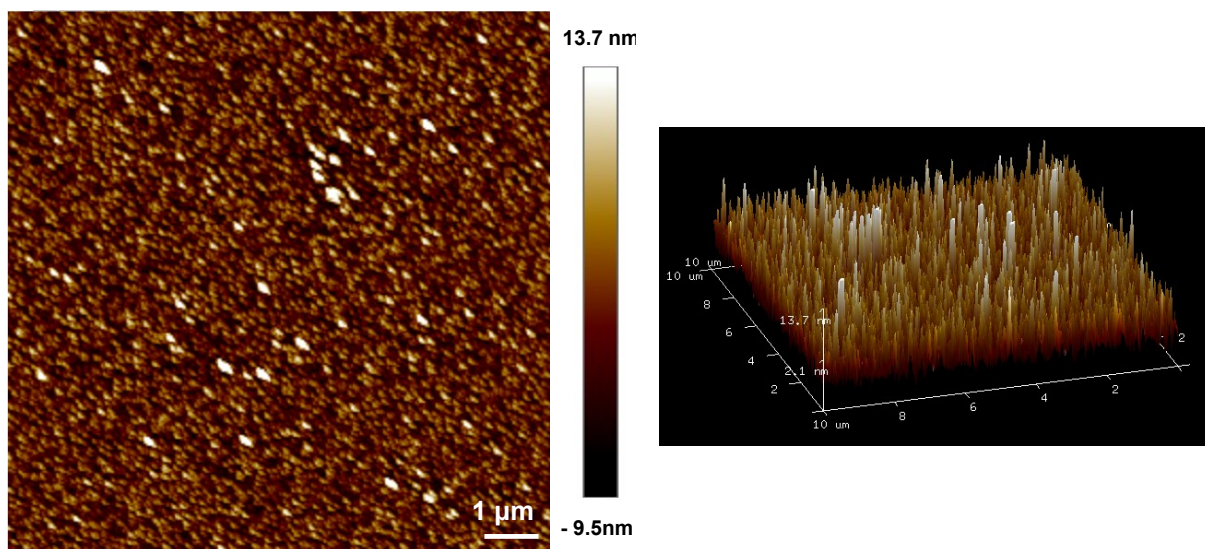

**Fig. S3.** AFM image of the DSPHTELP-peptide (scale bar = 1 μm).

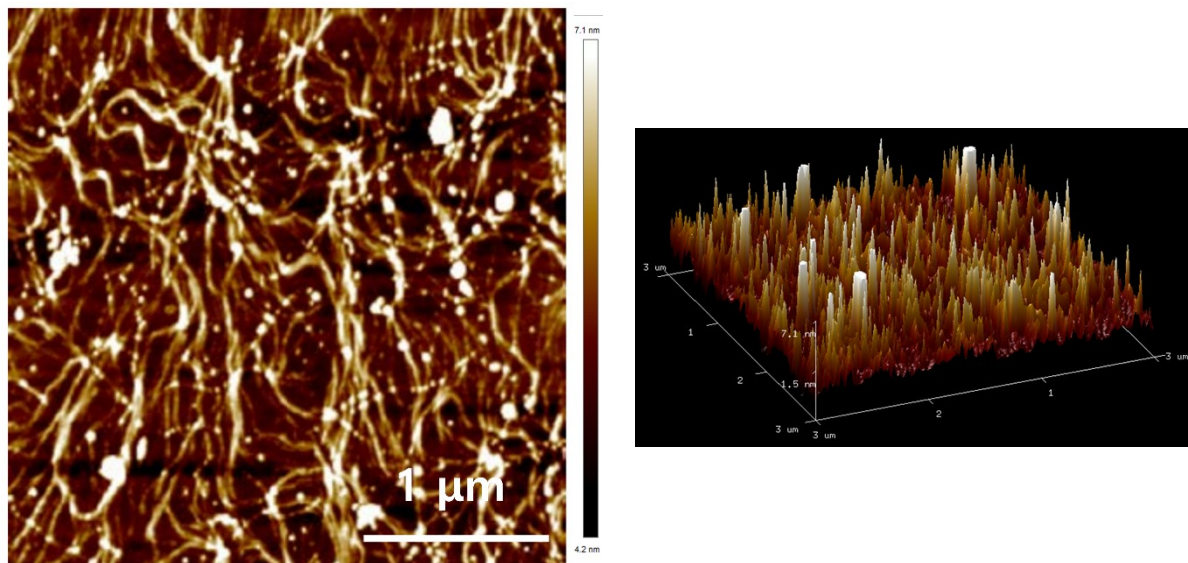

**Fig. S4.** AFM image of the M13 bacteriophages with DSPHTELP sequences (scale bar = 1 μm).<sup>1</sup>

### Supplementary References

1. C. Lim, J. Ko, D. Jeon, Y. Song, J. Park, J. Ryu and D. W. Lee, *Communications Chemistry*, 2019, **2**, 96.
